# Supplementary material for: Cms1 coordinates stepwise local 90S pre-ribosome assembly with timely snR83 release
Source: PubMed Central journal article supplement — Cell Rep. 2022 Nov 22;41(8):111684. doi: 10.1016/j.celrep.2022.111684 (PMC9715914; doi:10.1016/j.celrep.2022.111684), 2022-11-22
Supplement: mmc1.pdf [file mmc1.pdf]

**Cell Reports, Volume 41**

**Supplemental information**

**Cms1 coordinates stepwise local 90S pre-ribosome  
assembly with timely snR83 release**

**Benjamin Lau, Olga Beine-Golovchuk, Markus Kornprobst, Jingdong Cheng, Dieter Kressler, Beáta Jády, Tamás Kiss, Roland Beckmann, and Ed Hurt**

## **SUPPLEMENTAL INFORMATION**

### **Cms1 coordinates stepwise local 90S pre-ribosome assembly with timely snR83 release**

Benjamin Lau, Olga Beine-Golovchuk, Markus Kornprobst, Jingdong Cheng, Dieter Kressler, Beáta Jády, Tamás Kiss, Roland Beckmann and Ed Hurt

#### **Supplementary Figures**

**Figure S1 – Figure S7P**

Figure S1

**A** Diploid yeast strain generated by mating of *sup1-1* to *nop14ΔN3*

*Mat a Δnop14::clonNat SUP1 pRS416-URA3-ProtA-NOP14*  
*Mat α Δnop14::clonNat sup1-1 pRS416-HIS3-ProtA-nop14ΔN3*

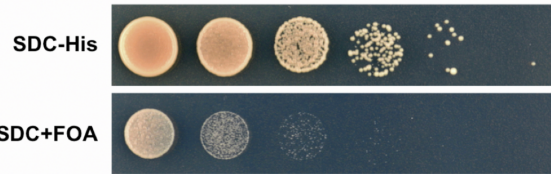

Tetrad analysis of diploid *SUP1/sup1-1 nop14ΔN3/nop14ΔN3*

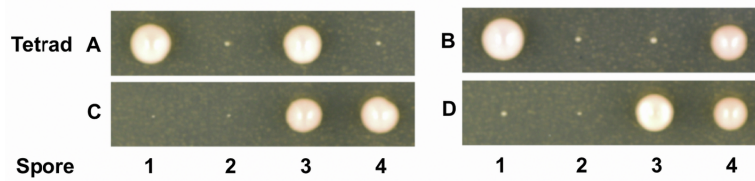

**B**

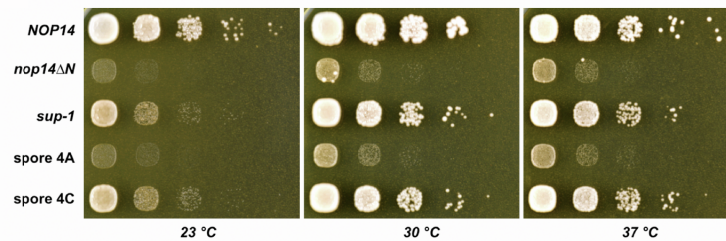

**C**

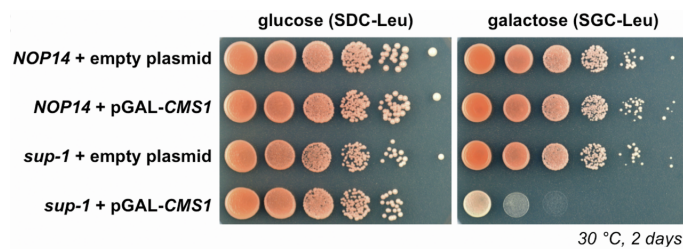

**D**

```

CMS1 ATGTC TAATCCAGATGATTTAGATGATGGACTCGCCTATGATTTTGATGCCGCAACATGAA 60
sup1-1 ATGTC TAATCCAGATGATTTAGATGATGGACTCGCCTATGATTTTGATGCCGCAACATGAA 60

CMS1 GTAATTTTGGACGCCAAGGATGGTAGTCCCCCAACCAAAAAGGTACAAAAGAGGCTATA 120
sup1-1 GTAATTTTGGACGCCAAGGATGGTAGTCCCCCAACCAAAAAGGTACAAAAGAGGCTATA 120

CMS1 GAACAAGATGACGATGACGTTGATGATATAGATGGGAAAAAGAGGAGAGAAATTCAGAA 180
sup1-1 GAACAAGATGACGATGACGTTGATGATATAGATGGGAAAAAGAGGAGAGAAATTCAGAA 180

CMS1 GATGATTCGAATAGACCTATTTCGAAAAGACAGAAAAAGCTACAGAAAAATCAAAGCT 239
sup1-1 GATGATTCGAATAGACCTATTTCGAAAAGACAGAAAAAGCTACAGAAAAATCAAAGCT 240
    
```

single nucleotide 't' insertion

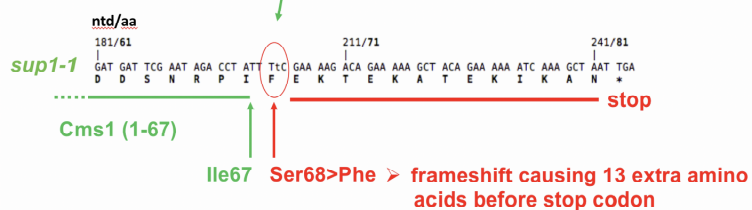

**Figure S1. Genetic analysis of the *sup1-1* suppressor derived from the *nop14ΔN3* strain. Related to Figures 1 and 2.**

(A) Mating of the *sup1-1* suppressor derived from the *nop14ΔN3* mutant to a *NOP14* shuffle strain ( $\Delta nop14::clonNat$ , pRS416-*URA3-ProtA-NOP14*) containing the pRS413-*HIS3-ProtA-nop14ΔN3* plasmid. When streaked on SDC+5-FOA, the derived diploid strain regained a slow-growing phenotype (upper panel), suggesting that the *sup1-1* mutation is recessive. This diploid strain was sporulated and tetrads were dissected, which revealed a 2:2 segregation of fast- and slow-growing colonies; all tetrad spores were *HIS*<sup>+</sup> indicating the presence of pRS413-*HIS3-ProtA-nop14ΔN3* plasmid (lower panel). Thus, two of the four tetrad spores revealed typical *sup1-1* suppressor activity, whereas the other two spores exhibit the slow-growing phenotype of the original *nop14ΔN3* mutant.

(B) Dot-spot growth analysis of the *sup1-1* suppressor strain derived from the *nop14ΔN3* mutant, as well as haploid progeny spore 4A and spore 4 (see panel A) after tetrad analysis.

(C) Plasmid-based *GAL-CMS1* expression in the *sup1-1* strain leads to loss of suppression. Wild-type cells and the *sup1-1* strain were transformed with empty or *GAL-CMS1* carrying *LEU2* plasmids, before representative transformants were grown on either glucose-containing (SDC–Leu) or galactose-containing (SGC–Leu) plates at 30°C for 2 days.

(D) The chromosomal mutation in the *sup1-1* suppressor strain is identified as a "T" insertion frameshift mutation within the *CMS1* gene. Genome sequencing of the *sup1-1* yeast strain (*nop14ΔN3* derived) identified a "T" nucleotide insertion in the nonessential *CMS1* gene leading to a drastically shortened protein. Upper panel: A cut out of the DNA sequence obtained from genomic sequencing, starting at the start codon of the *CMS1* gene from W303 wild-type yeast (*CMS1*) and the *sup1-1* suppressor strain and including the discovered "T" (t) insertion at position 202 in the *sup1-1* DNA sequence. Lower panel: By prediction, the T insertion mutation generates a truncated Cms1 protein (wild-type protein, 291 amino acids) with Ser68Phe at the insertion site, followed by a frameshifted 13-amino-acid long extension before a stop codon.





**Figure S2. The conserved Cms1 has a helicase fold but lacks typical helicase motifs. Related to Figures 1 and 2.**

(A) Multiple sequence alignment of Cms1 homologues from *Saccharomyces cerevisiae* (*sc*), *Chaetomium thermophilum* (*ct*), *Schizosaccharomyces pombe* (*sp*), *Homo sapiens* (*hs*), *Mus musculus* (*mm*) and *Danio rerio* (*dr*). Cms1 has a predicted helicase fold but lacks functional motifs (e.g. Walker A, DEAD box) and consists of only one of the two RecA-like helicase domains.

(B) Secondary structure prediction (<https://toolkit.tuebingen.mpg.de/hhpred>) of *ct*Cms1 in comparison to crystallized *ct*Prp28 helicase. Note that Cms1 lacks typical helicase motifs such as Walker A (ATP binding) and DEAD box.

(C) Alpha-fold prediction (<https://alphafold.ebi.ac.uk/entry/P12270>) of yeast Cms1 in comparison to the crystal structure of a classical helicase (*hs* Prp28, PDB: 4NHO; only the first helicase RecA-like domain is shown). Only the part of the structures (*sc*Cms1 residues 94–289; *hs*Prp28 residues 391–569) exhibiting structural homology is shown.

Figure S3

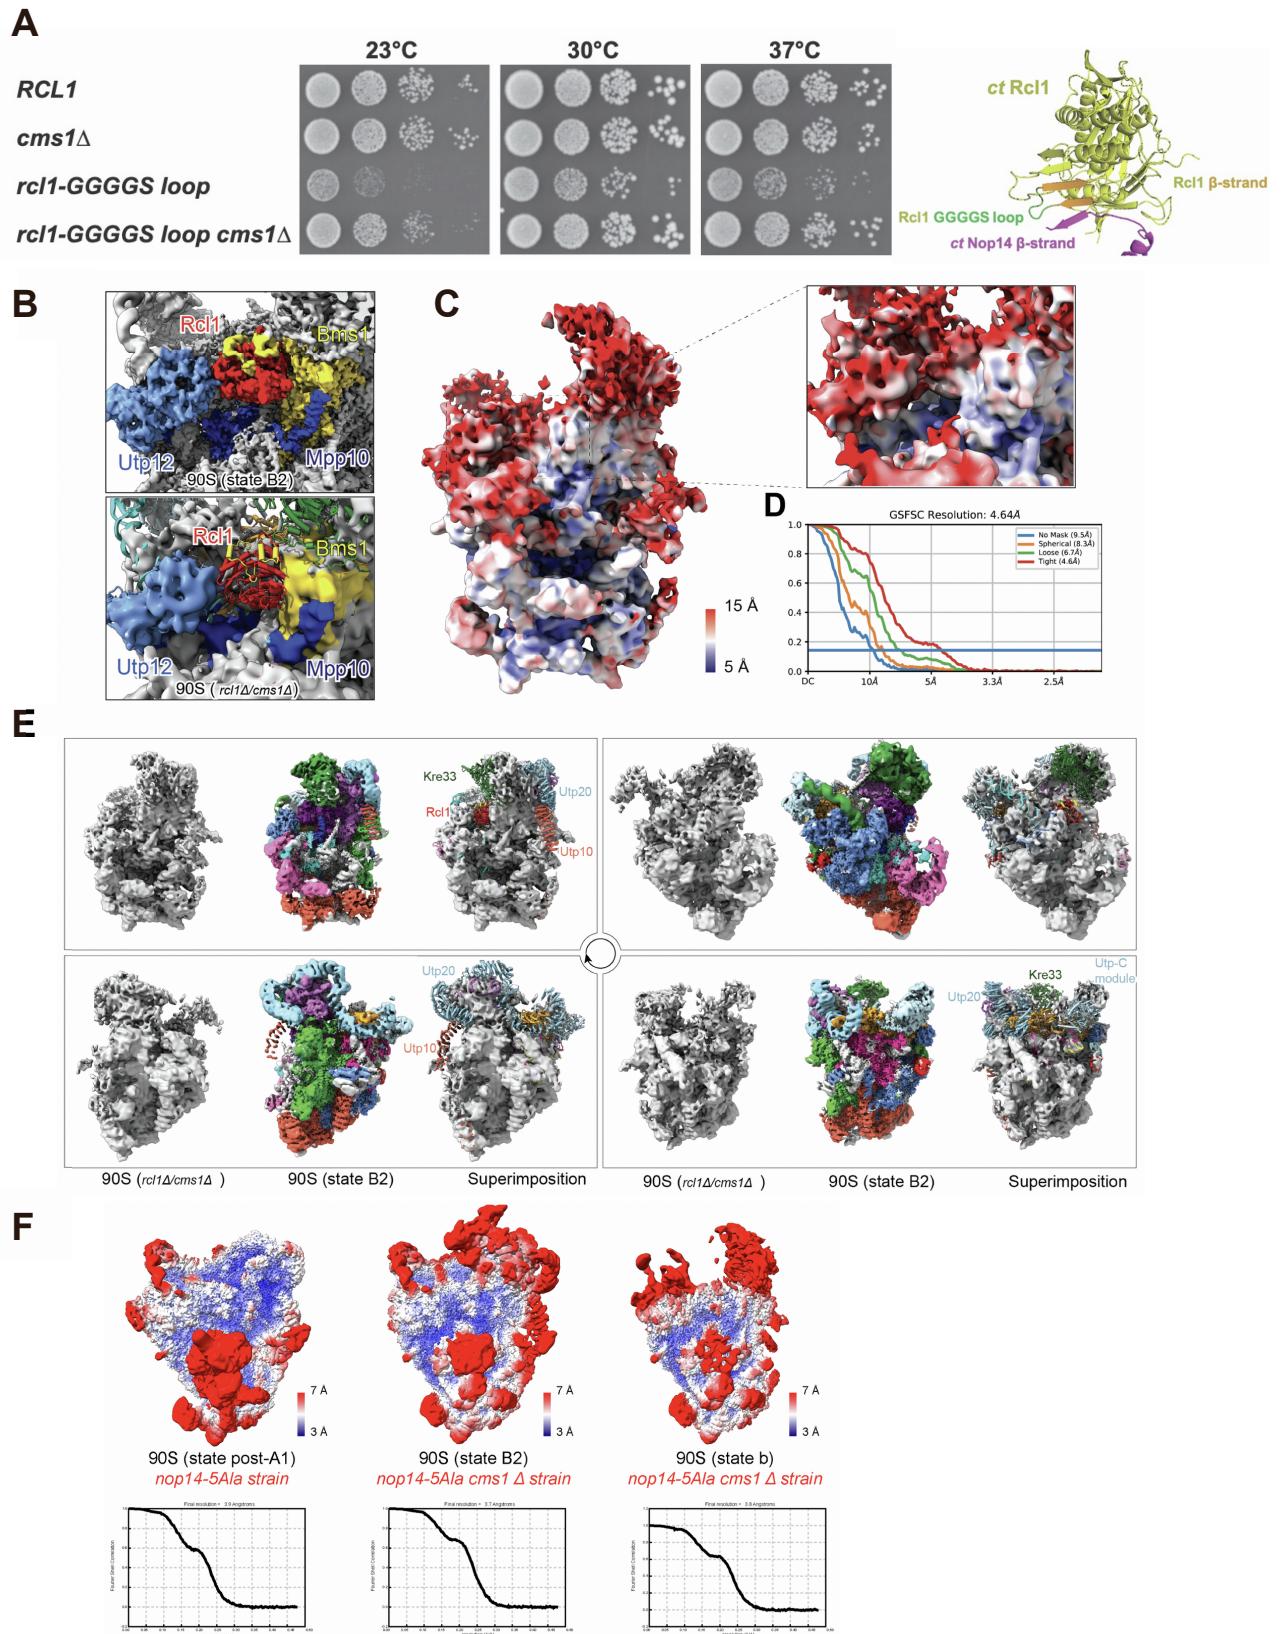

**Figure S3. Different *rcl1* mutants and the *nop14-5A1a* strain are suppressed by *cms1Δ*. Related to Figures 2 and 3.**

(A) Slow-growth phenotype of the *rcl1*-GGGS loop mutant suppressed by *cms1Δ*. Left part: Dot-spot growth analysis of wild-type *RCL1* yeast (W303), single *cms1Δ* and *rcl1*-GGGS loop mutants, and double-mutant *rcl1*-GGGS loop *cms1Δ*. Cells were grown at 23°C, 30°C, and 37°C for 2 days. Right part: Rcl1 structure (yellow), extracted from the *Chaetomium thermophilum* ctNoc4–Kre33 90S pre-ribosome (PDB: 6RXU, 6RXV), is built from several β-strands, of which a peripheral strand (orange) aligns with a β-strand in the Nop14 N terminus (magenta). From that β-strand emerges a loop connecting another adjacent Rcl1 β-strand (orange); this loop has been replaced by a glycine–serine (GGGS) linker (green; predicted length 19 Å), resulting in the *rcl1*-GGGS loop mutant

(B-E) Cryo-EM analysis of 90S pre-ribosomal particles, isolated from the double-disruption *rcl1Δ cms1Δ* strain via the 90S bait protein FTpA-Utp18. For comparison, the cryo-EM structure of an intact yeast 90S particle in state B2 (EMD-11358) is shown. (B) Depicted for comparison are the cryo-EM structures focusing on the Rcl1 region of an intact yeast 90S (state B2) (EMD-11358, up) and of the 90S from the double-disruption *rcl1Δ cms1Δ* strain (down). Superimposition of the molecular model of the 90S (state B2) (PDB:6ZQB) with the 90S (*rcl1Δ cms1Δ*) density map was shown to illustrate the difference.

(C) Local resolution distribution of the 90S particle (*rcl1Δ cms1Δ*) calculated in Relion. A focusing view on the Rcl1 region is shown as an insert on the top-right.

(D) Gold-standard FSC curve of the 90S structure (*rcl1Δ cms1Δ*) calculated in cryoSPARC. The overall resolution of the 90S from the *rcl1Δ cms1Δ* strain is 6.7 Å (using a loose mask from cryoSPARC).

(E) Four different comparative views of the 90S (state B2 wild-type) and 90S (*rcl1Δ cms1Δ*). The 90S structures (*rcl1Δ cms1Δ*) are shown on the left, while the 90S (state B2) structures in a related orientation are shown in the middle. The superimposition of the 90S (*rcl1Δ cms1Δ*) with 90S (state B2 wild-type) molecular model are shown on the right.

(F) Local resolution distributions and FSC curves of different 90S particles isolated via Dhr1-Dim1 from mutants *nop14-5A1a* (left panel; see Figure 3C), and via FTpA-Utp18 from *nop14-5A1a cms1Δ* (middle and right panel; see Figure 2D).



Figure S4

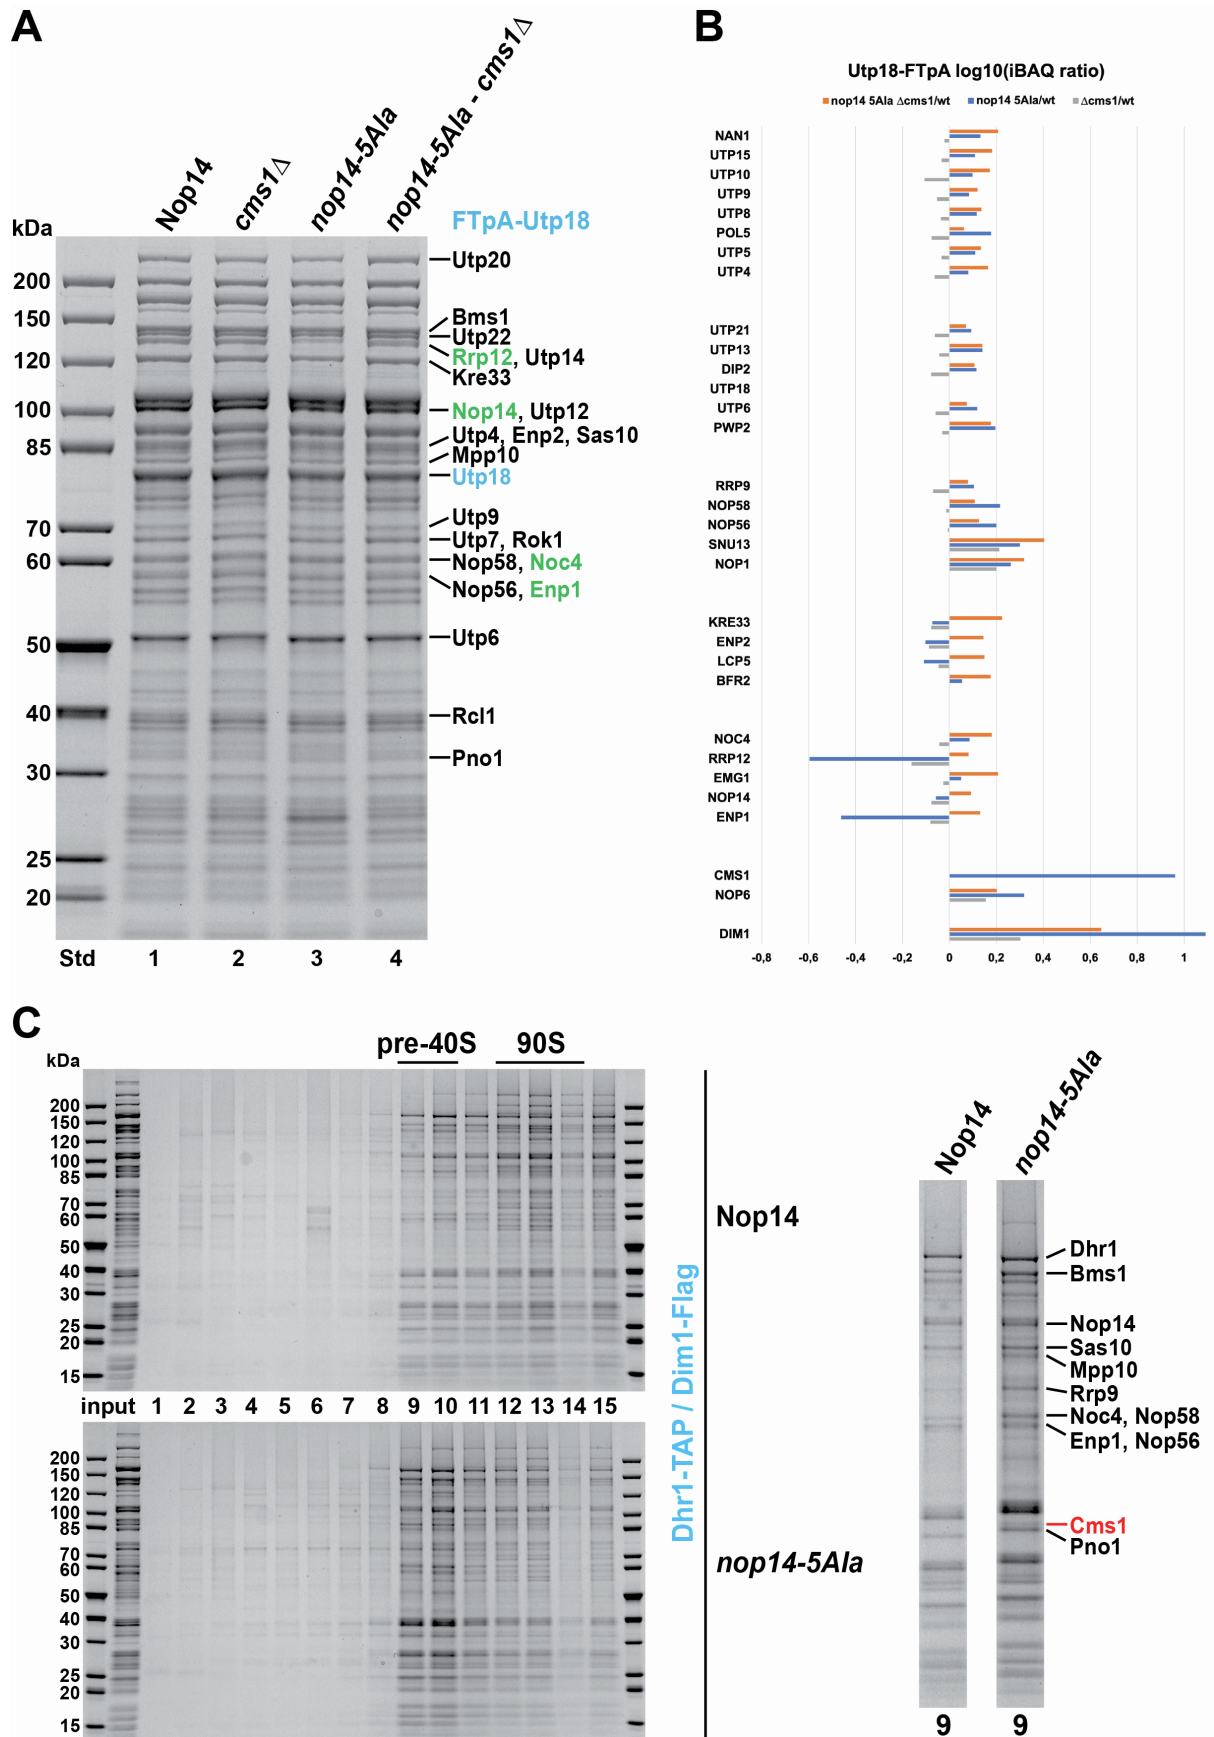

**Figure S4. Affinity purification of the different 90S particles from *nop14-5Ala* mutant and *nop14-5Ala cms1Δ* suppressor. Related to Figure 3.**

(A, B) Utp18-FTpA was affinity purified in a second independent experiment, similar to that shown in Figure 3A, from wild-type yeast (*NOP14*), *cms1Δ* mutant, *nop14-5Ala* mutant, and *nop14-5Ala cms1Δ* suppressor. The final eluates were analyzed on a 4–12% gradient SDS-polyacrylamide gel with Coomassie Blue staining (A), or by semiquantitative mass spectrometry (B) as described in Method Details. The label-free quantification (intensity-based absolute quantification, iBAQ) values obtained for the co-enriched 90S factors were normalized to the Utp18 bait protein, which itself was set to 1. The iBAQ ratios of *cms1Δ* versus wild-type (wt) values (gray bars), *nop14-5AlaΔ* versus wt (blue bars), and *nop14-5Ala cms1Δ* versus wt (orange bars) are shown as log<sub>10</sub>-fold increase ("+" values on the x axis) or decrease ("–" values on the x axis). The whole set of iBAQ values from this semiquantitative mass spectrometry analysis is shown in [Table S1](#).

(C) Sucrose gradient centrifugation of Dhr1–Dim1 split-tag affinity-purified 90S>pre-40S particles isolated from the wild type (*NOP14*, upper panel) and the *nop14-5Ala* mutant (lower panel). The final eluates were loaded onto a 15–45% sucrose gradient and the collected fractions 1–15 were analyzed on a 4–12% gradient SDS-polyacrylamide gel and stained with Coomassie Blue. Fractions 9 containing primordial pre-40S particles are separately displayed on the right, and the bands indicated were identified by mass spectrometry.

**Figure S5**

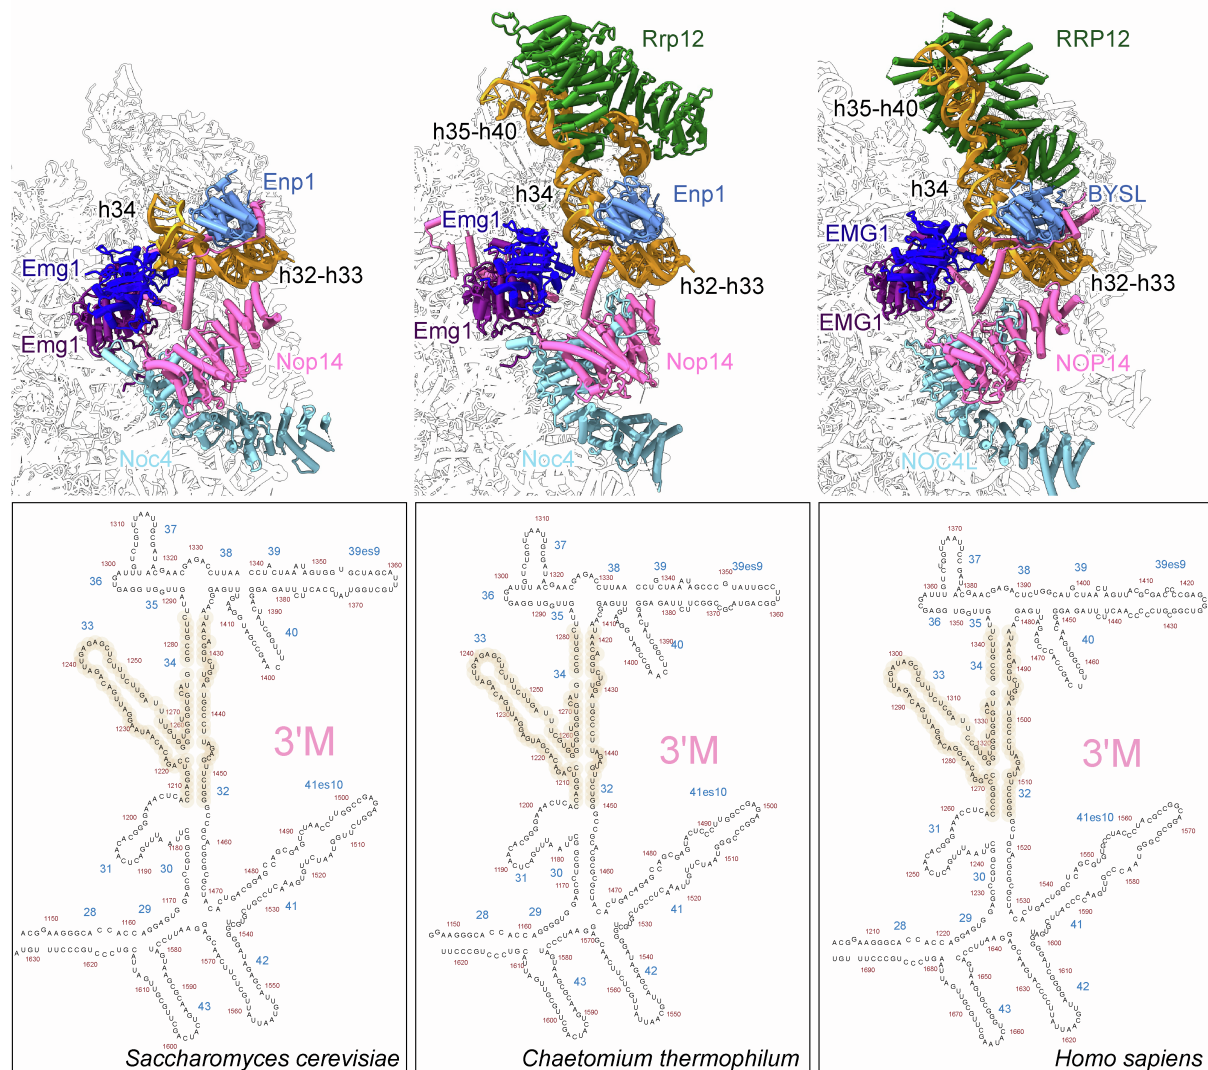

**Figure S5. Conserved Noc4 module components Rrp12 and Enp1 establish a specific interaction with the 3'-major domain of the 18S rRNA. Related to Figures 2 and 4.**

The cryo-EM structures of *Saccharomyces cerevisiae* (PDB: 6ZQC), *Chaetomium thermophilum* (PDB: 6RXU, updated), and *Homo sapiens* (PDB: 7MQA) 90S particles in the region of the Noc4–Nop14–Emg1–Enp1–Rrp12 module, which interacts with the 3' major domain. In human and *ct* 90S, BYSL/Enp1 is wedged between H32–H33–H34 and the RRP12  $\alpha$ -solenoid that encircles H35–H40.

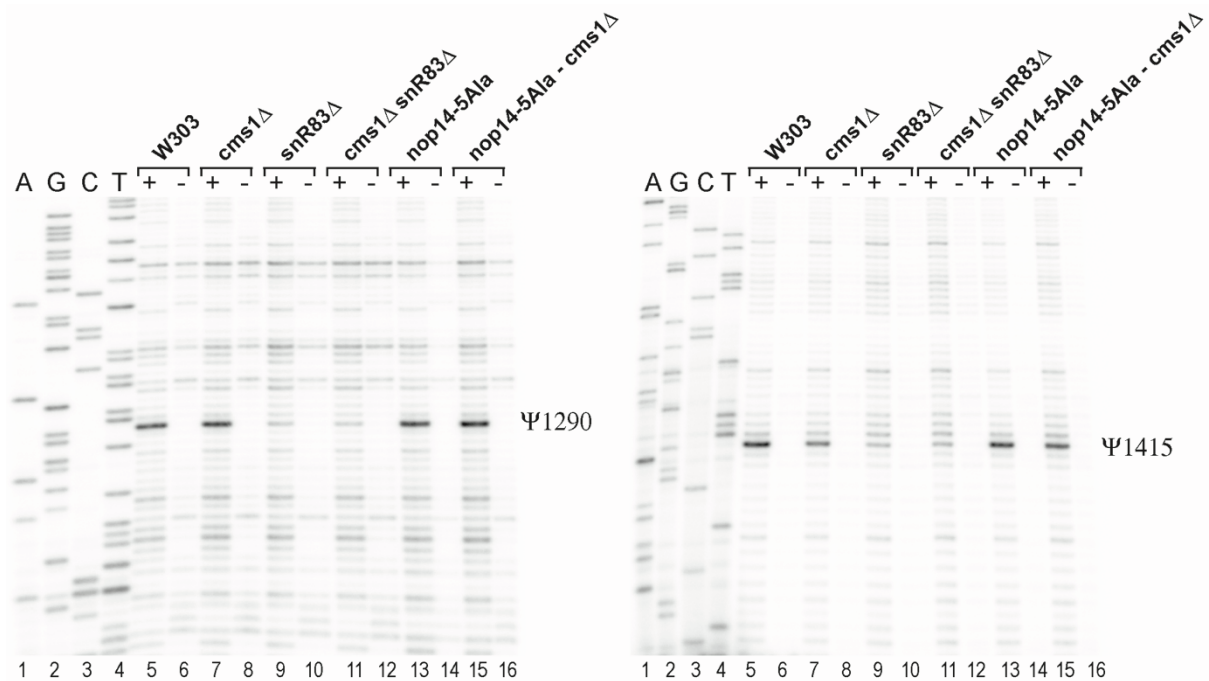

**Figure S6. Pseudouridylation assay reveals that Cms1 is not required for snR83 guided  $\Psi$  1290 and  $\Psi$  1415 modifications in the yeast 18S rRNA. Related to Figure 5 and 6.**

Pseudouridylation mapping of snR83 catalyzed modifications  $\Psi$  1290 and  $\Psi$  1415 in the 18S rRNA extracted from the indicated yeast strains.  $\Psi$ s covalently modified by CMCT ( $N^3$ -1-cyclohexyl-3-(2-morpholinoethyl)carbodiimide metho-*p*-toluenesulfonate) were detected by primer extension analysis using terminally labeled 18S-specific primers and AMV reverse transcriptase. Lanes 1-4: A,G,C,T dideoxy sequencing reactions performed on 18S ribosomal DNA with the same 18S-specific primers. Lanes 5-16 : primer extension analysis using total RNA extracted from W303 (our wild-type yeast), *cms1* $\Delta$ , *snR83* $\Delta$ , *cms1* $\Delta$  *snR83* $\Delta$ , *nop14-5Ala* and *nop14-5Ala - cms1* $\Delta$  strains with (+) or without (-) previous CMCT-treatment.  $\Psi$  1290 and  $\Psi$  1415 are detected as RT stop signals and are indicated on the right. We noticed that the  $\Psi$  1415, but not the  $\Psi$  1290 modification was consistently decreased in the *cms1* $\Delta$  strains.



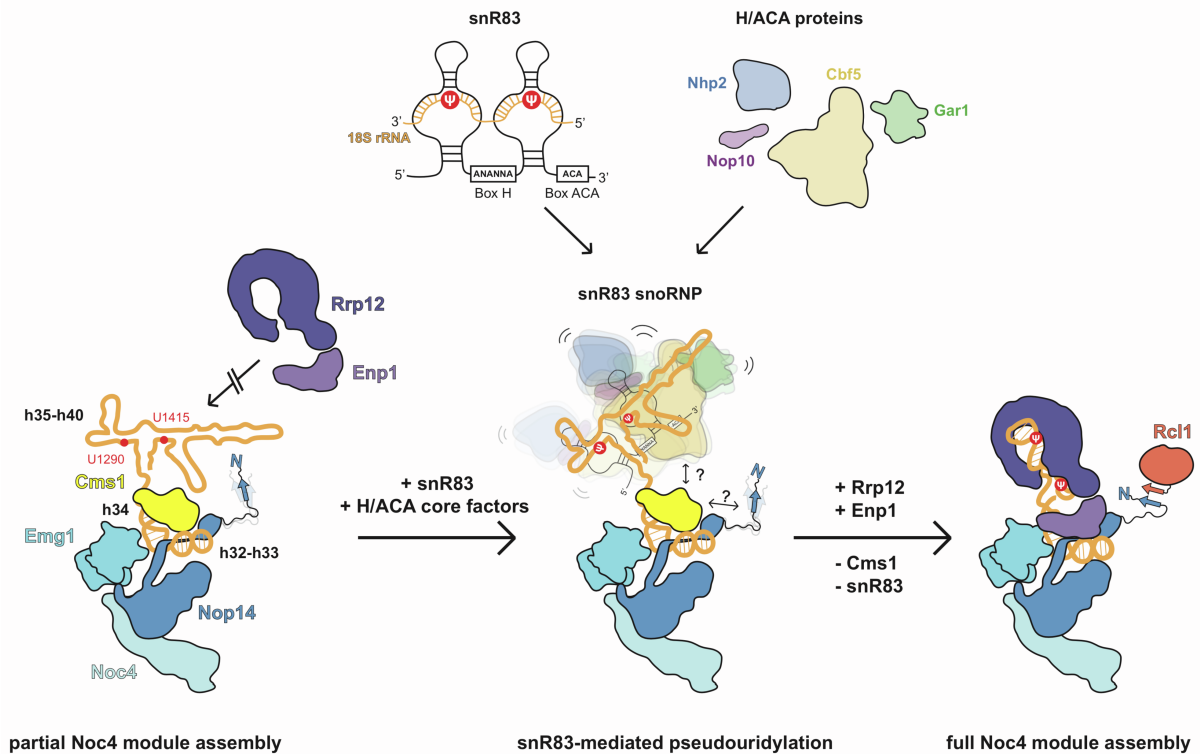

**Figure S7. Model of Cms1 function at the 3'-major domain in coordination with stepwise Noc4 module assembly during early 90S biogenesis. Related to Figures 5-7.**

Scheme of the stepwise Noc4 module assembly in the region of the 18S rRNA 3' major domain, consisting of rRNA helices h32-h40, within the 90S pre-ribosome. At an early phase (left), Noc4-Nop14-Emg1 members, but not Rrp12-Enp1, are bound to the 3'-major domain (partial Noc4 module assembly), at which also Cms1 is present by docking to h32-h34. This hinders Rrp12-Enp1 binding, but allows snR83 with its box H/ACA core factors (Cbf5, Gar1, Nhp2, Nop10) to bind to the exposed h35-h40 region to catalyze the pseudouridylation at two specific target sites, U1290 and U1415 (middle). Following this modification reaction, Cms1 and snR83 leave the 90S, allowing Rrp12-Enp1 to enter and complete Noc4 module assembly during 90S maturation (right). Finally, the Nop14 N-terminal  $\beta$ -blade contacts another  $\beta$ -blade in Rcl1, which could provide a signal for the next maturation steps until the 90S>pre-40S transition. For further explanations, see main text.
